# Supplementary material for: Drug-Loaded Lipid-Core Micelles in Mucoadhesive Films as a Novel Dosage Form for Buccal Administration of Poorly Water-Soluble and Biological Drugs
Source: MDPI journal article supplement (doi:10.3390/pharmaceutics12121168), 2020-11-30
Supplement: s1 [file s1]

# Supplementary Material: Drug-Loaded Lipid-Core Micelles in Mucoadhesive Films as a Novel Dosage Form for Buccal Administration of Poorly Water-Soluble and Biological Drugs

Wai-Houng Chou, Ariel Galaz, Miguel O. Jara, Alexander Gamboa, and Javier O. Morales

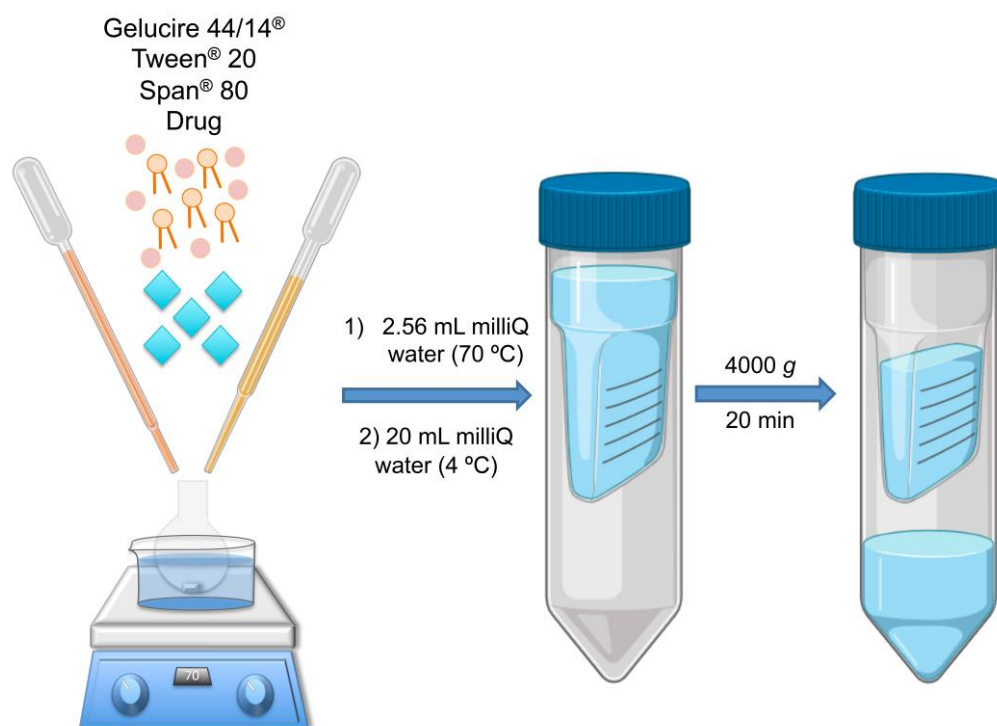

**Figure S1.** Schematization of the elaboration process of different drug-loaded lipid-core micelles, using the method of low-energy hot emulsification.

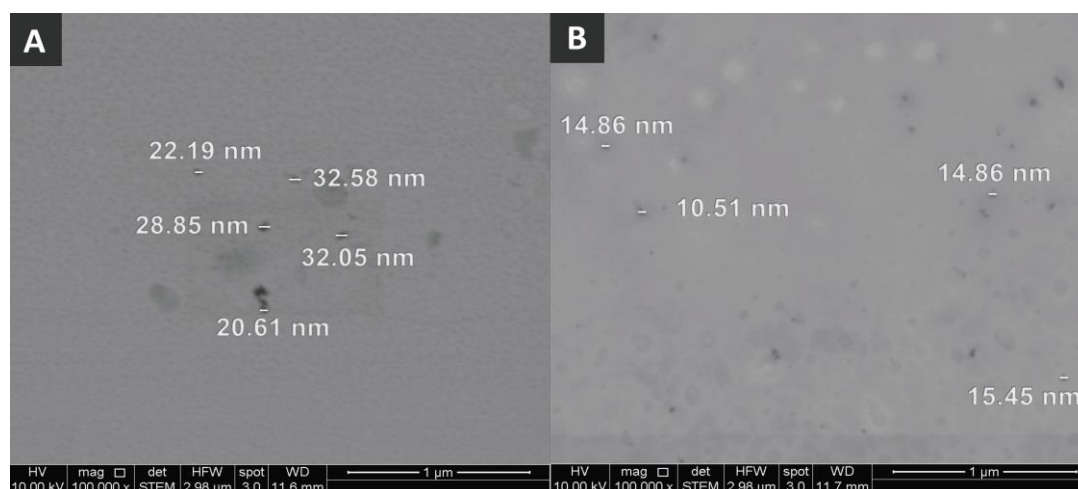

**Figure S2.** Scanning transmission electron microscopy (STEM) micrographs of: (A) rhodamine 123-loaded lipid-core micelles, and (B) insulin-loaded lipid-core micelles.

**Table S1.** Cumulative *in vitro* release values of rhodamine 123 (Rho) and insulin (Ins) from lipid-core micelles, at 37 °C using PBS pH 7.4. Values are represented as mean  $\pm$  standard deviation of three different batches (n = 3). Different superscript letters in the same row indicates statistical differences by *t*-test ( $p < 0.05$ ).

| Time (h) | Rho (%)                       | Ins (%)                        |
|----------|-------------------------------|--------------------------------|
| 0.25     | 1.00 $\pm$ 0.53 <sup>A</sup>  | 17.52 $\pm$ 5.80 <sup>B</sup>  |
| 0.50     | 2.92 $\pm$ 0.85 <sup>A</sup>  | 25.38 $\pm$ 3.30 <sup>B</sup>  |
| 0.75     | 4.72 $\pm$ 0.92 <sup>A</sup>  | 30.69 $\pm$ 5.39 <sup>B</sup>  |
| 1.00     | 6.37 $\pm$ 1.02 <sup>A</sup>  | 32.42 $\pm$ 2.70 <sup>B</sup>  |
| 1.50     | 9.04 $\pm$ 1.18 <sup>A</sup>  | 33.75 $\pm$ 4.30 <sup>B</sup>  |
| 2.00     | 11.00 $\pm$ 1.06 <sup>A</sup> | 36.71 $\pm$ 4.92 <sup>B</sup>  |
| 24       | 21.40 $\pm$ 1.83 <sup>A</sup> | 64.55 $\pm$ 6.96 <sup>B</sup>  |
| 48       | 24.67 $\pm$ 3.68 <sup>A</sup> | 81.01 $\pm$ 13.10 <sup>B</sup> |
| 72       | 25.88 $\pm$ 4.22 <sup>A</sup> | 87.85 $\pm$ 11.50 <sup>B</sup> |

**Table S2.** Cumulative *ex vivo* permeation values of rhodamine 123 in solution, loaded in lipid-core micelles (LCMs) and in LCMs-loaded on mucoadhesive films through excised porcine buccal epithelium, with phosphate buffer pH 6.8. Values are represented as mean  $\pm$  standard deviation of six different batches (n = 6). Different superscript letters in the same row indicates statistical differences by one-way ANOVA with Tukey's multiple comparison tests ( $p < 0.05$ ).

| Time (min) | Cumulative permeation of rhodamine 123 (%) |                              |                                |
|------------|--------------------------------------------|------------------------------|--------------------------------|
|            | In solution                                | LCMs                         | LCMs-Film                      |
| 6          | 0.24 $\pm$ 0.11 <sup>A</sup>               | 0.23 $\pm$ 0.05 <sup>A</sup> | 38.81 $\pm$ 5.40 <sup>B</sup>  |
| 12         | 0.30 $\pm$ 0.08 <sup>A</sup>               | 0.24 $\pm$ 0.05 <sup>A</sup> | 40.68 $\pm$ 5.46 <sup>B</sup>  |
| 18         | 0.31 $\pm$ 0.08 <sup>A</sup>               | 0.30 $\pm$ 0.04 <sup>A</sup> | 42.99 $\pm$ 5.92 <sup>B</sup>  |
| 24         | 0.34 $\pm$ 0.11 <sup>A</sup>               | 0.35 $\pm$ 0.03 <sup>A</sup> | 48.20 $\pm$ 8.27 <sup>B</sup>  |
| 30         | 0.39 $\pm$ 0.10 <sup>A</sup>               | 0.40 $\pm$ 0.04 <sup>A</sup> | 49.13 $\pm$ 8.74 <sup>B</sup>  |
| 36         | 0.41 $\pm$ 0.11 <sup>A</sup>               | 0.45 $\pm$ 0.05 <sup>A</sup> | 48.75 $\pm$ 7.39 <sup>B</sup>  |
| 42         | 0.46 $\pm$ 0.13 <sup>A</sup>               | 0.54 $\pm$ 0.05 <sup>A</sup> | 50.16 $\pm$ 8.38 <sup>B</sup>  |
| 48         | 0.48 $\pm$ 0.09 <sup>A</sup>               | 0.63 $\pm$ 0.10 <sup>A</sup> | 52.84 $\pm$ 9.31 <sup>B</sup>  |
| 54         | 0.58 $\pm$ 0.08 <sup>A</sup>               | 0.72 $\pm$ 0.08 <sup>A</sup> | 54.10 $\pm$ 10.01 <sup>B</sup> |
| 60         | 0.69 $\pm$ 0.09 <sup>A</sup>               | 0.99 $\pm$ 0.31 <sup>A</sup> | 56.02 $\pm$ 11.48 <sup>B</sup> |

**Table 3.** Cumulative *ex vivo* permeation values of insulin in solution, loaded in lipid-core micelles (LCMs) and in LCMs-loaded on mucoadhesive films through excised porcine buccal epithelium, with phosphate buffer pH 6.8. Values are represented as mean  $\pm$  standard deviation of five different batches (n = 5). Different superscript letters in the same row indicates statistical differences by one-way ANOVA with Tukey's multiple comparison tests ( $p < 0.05$ ).

| Time (min) | Cumulative permeation of insulin (%) |                              |                                |
|------------|--------------------------------------|------------------------------|--------------------------------|
|            | In solution                          | LCMs                         | LCMs-Film                      |
| 6          | 0.20 $\pm$ 0.14 <sup>A</sup>         | 0.58 $\pm$ 0.36 <sup>A</sup> | 20.85 $\pm$ 8.89 <sup>B</sup>  |
| 12         | 0.55 $\pm$ 0.48 <sup>A</sup>         | 1.17 $\pm$ 0.63 <sup>A</sup> | 24.64 $\pm$ 6.85 <sup>B</sup>  |
| 18         | 1.40 $\pm$ 0.75 <sup>A</sup>         | 1.99 $\pm$ 0.72 <sup>A</sup> | 25.71 $\pm$ 7.79 <sup>B</sup>  |
| 24         | 1.25 $\pm$ 1.07 <sup>A</sup>         | 3.80 $\pm$ 1.32 <sup>A</sup> | 32.09 $\pm$ 12.84 <sup>B</sup> |
| 30         | 1.77 $\pm$ 1.22 <sup>A</sup>         | 4.63 $\pm$ 2.55 <sup>A</sup> | 32.79 $\pm$ 12.23 <sup>B</sup> |
| 36         | 1.94 $\pm$ 1.34 <sup>A</sup>         | 6.23 $\pm$ 1.86 <sup>A</sup> | 33.28 $\pm$ 12.63 <sup>B</sup> |
| 42         | 2.59 $\pm$ 1.10 <sup>A</sup>         | 7.00 $\pm$ 2.13 <sup>A</sup> | 37.08 $\pm$ 20.94 <sup>B</sup> |
| 48         | 2.65 $\pm$ 0.82 <sup>A</sup>         | 7.45 $\pm$ 2.47 <sup>B</sup> | 35.86 $\pm$ 2.04 <sup>C</sup>  |
| 54         | 2.95 $\pm$ 1.08 <sup>A</sup>         | 8.39 $\pm$ 1.58 <sup>A</sup> | 37.03 $\pm$ 15.44 <sup>B</sup> |
| 60         | 3.28 $\pm$ 0.69 <sup>A</sup>         | 9.11 $\pm$ 2.15 <sup>A</sup> | 39.59 $\pm$ 7.37 <sup>B</sup>  |
